# Supplementary material for: The Long-Term Outcome Comparison of Different Time-Delayed Kallikrein Treatments in a Mouse Cerebral Ischemic Model
Source: Hindawi journal article supplement (doi:10.1155/2018/1706982), 2018-01-01
Supplement: f1 [file 1706982.f1.pdf]

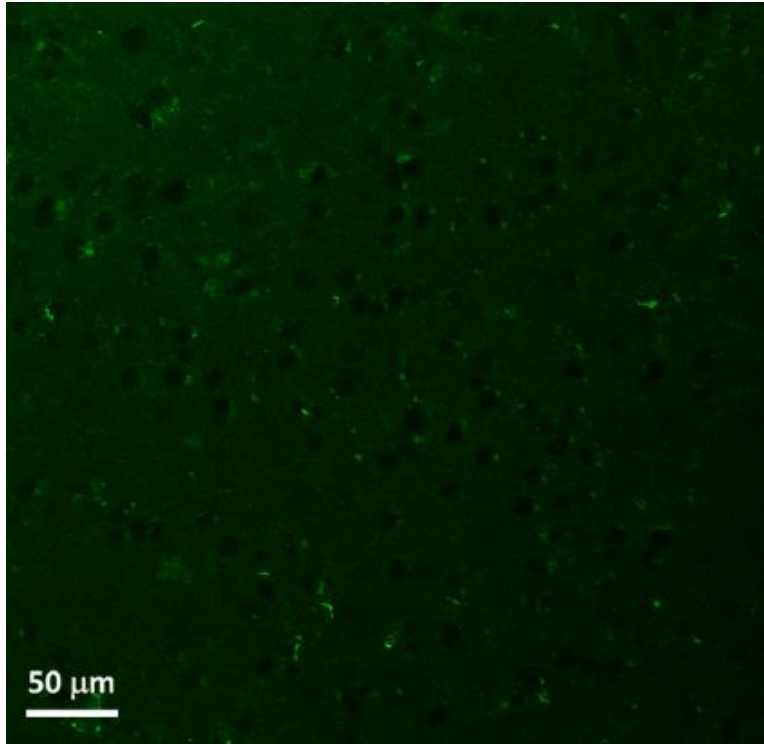

Negative control for NeuN in Fig.3

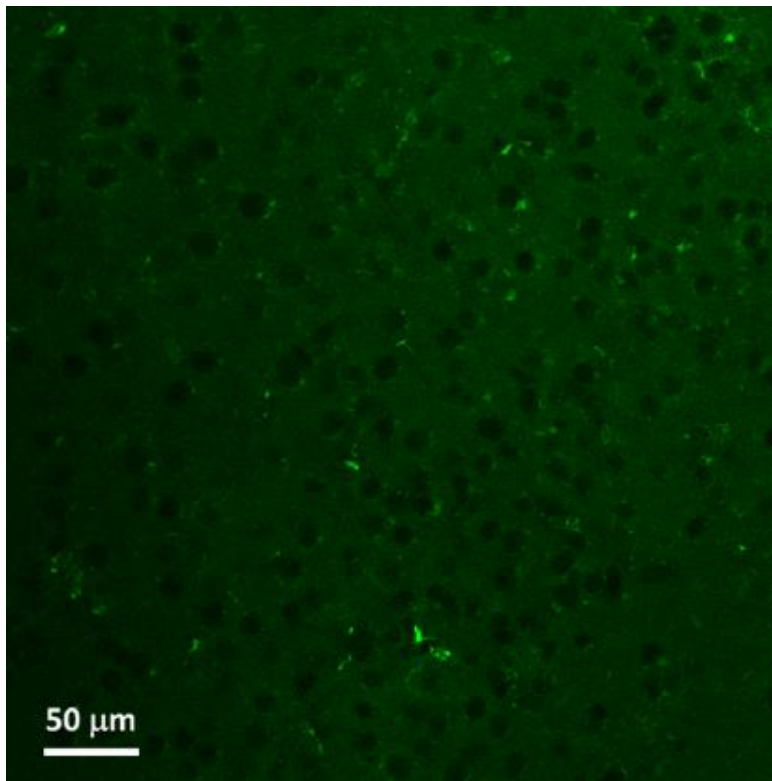

Negative control for Tuj-1 in Fig.4
